# Supplementary material
Source: PubMed Central journal article supplement (PMC58512)
Supplement: pnas_98_19_10602__1.pdf [file pnas_98_19_10602__1.pdf]

Supporting information for Bae *et al.* (2001) *Proc. Natl. Acad. Sci. USA* **98** (19), 10602–10607. (10.1073/pnas.191268798)

**Table 2. Measured residual dipolar couplings**

| Residues $^1\text{H}$ - $^{13}\text{C}$ | Measured residual dipolar couplings, Hz |
|-----------------------------------------|-----------------------------------------|
| G2 H1'-C1'                              | $1.5 \pm 1.0$                           |
| A4 H1'-C1'                              | $4.4 \pm 1.0$                           |
| A6 H1'-C1'                              | $-2.4 \pm 1.0$                          |
| A7 H1'-C1'                              | $1.5 \pm 1.0$                           |
| A8 H1'-C1'                              | $6.3 \pm 1.0$                           |
| G12 H1'-C1'                             | $0.5 \pm 1.0$                           |
| G13 H1'-C1'                             | $1.2 \pm 1.0$                           |
| C14 H6-C6                               | $-0.4 \pm 1.0$                          |
| U16 H1'-C1'                             | $1.4 \pm 1.0$                           |
| U16 H6-C6                               | $-0.6 \pm 1.0$                          |
| C17 H1'-C1'                             | $1.6 \pm 1.0$                           |
| C17 H4'-C4'                             | $1.0 \pm 1.0$                           |
| G18 H1'-C1'                             | $-0.6 \pm 1.0$                          |
| G18 H3'-C3'                             | $1.4 \pm 1.0$                           |
| G19 H1'-C1'                             | $2.4 \pm 1.0$                           |
| C20 H6-C6                               | $1.2 \pm 1.0$                           |
| C21 H1'-C1'                             | $-0.5 \pm 1.0$                          |
| C21 H6-C6                               | $1.8 \pm 1.0$                           |
| U22 H1'-C1'                             | $0.8 \pm 1.0$                           |
| U25 H1'-C1'                             | $-1.3 \pm 1.0$                          |
| U27 H1'-C1'                             | $-8.1 \pm 1.0$                          |
| G29 H1'-C1'                             | $-6.1 \pm 1.0$                          |
